# Supplementary material for: Durable organic solar cells produced by in situ encapsulation of an air-sensitive natural organic semiconductor by the fullerene derivative and the metal oxide layer
Source: Royal Society of Chemistry journal article supplement (doi:10.1039/d0tc00379d), 2020-01-01
Supplement: d0tc00379d1.pdf [file d0tc00379d1.pdf]

## Electronic Supplementary information

### Durable organic solar cells produced by in-situ encapsulation of an air-sensitive natural organic semiconductor by the fullerene derivative and the metal oxide layer

Takayuki Uchiyama, Takashi Sano, Yoshiko Okada-Shudo and Varun Vohra \*

\* varun.vohra@uec.ac.jp

| Blend ratio<br>(bCar : PC <sub>71</sub> BM) | Irradiation time [minutes] |   |    |    |      |
|---------------------------------------------|----------------------------|---|----|----|------|
|                                             | 0                          | 3 | 10 | 60 | 1440 |
| 1:0                                         |                            |   |    |    |      |
| 1:1                                         |                            |   |    |    |      |
| 1:2                                         |                            |   |    |    |      |
| 1:4                                         |                            |   |    |    |      |
| 1:4 + electrode                             |                            |   |    |    |      |

Figure S1: bCar and bCar:PC<sub>71</sub>BM thin films exposed to continuous irradiation under 1 sun for up to 24h.

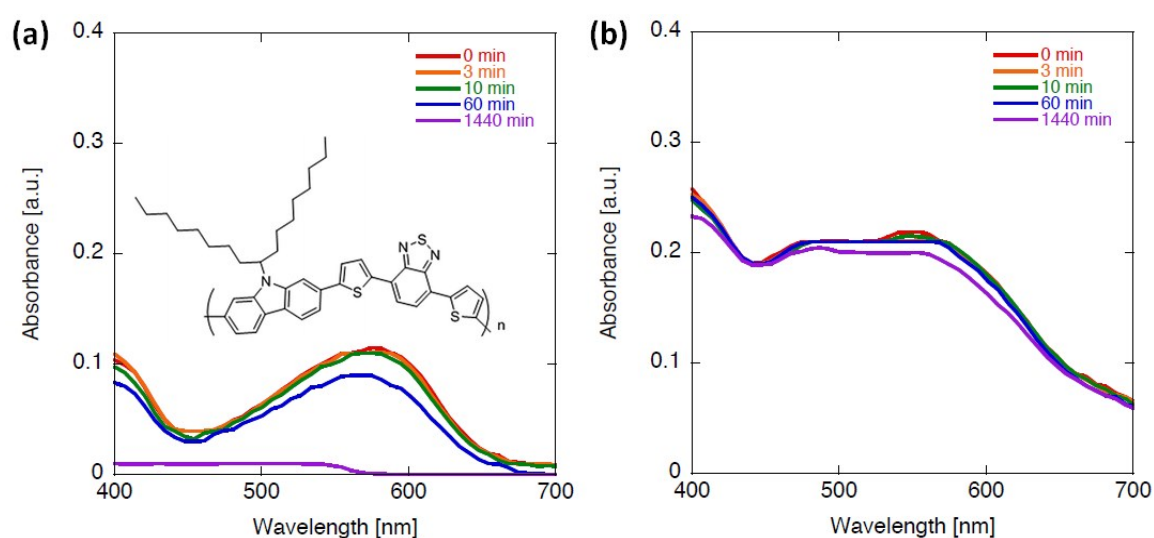

Figure S2: Absorption spectra of (a) PCDTBT and (b) PCDTBT:PC<sub>71</sub>BM (1:4) thin films under continuous irradiation at 1 sun for up to 24h.

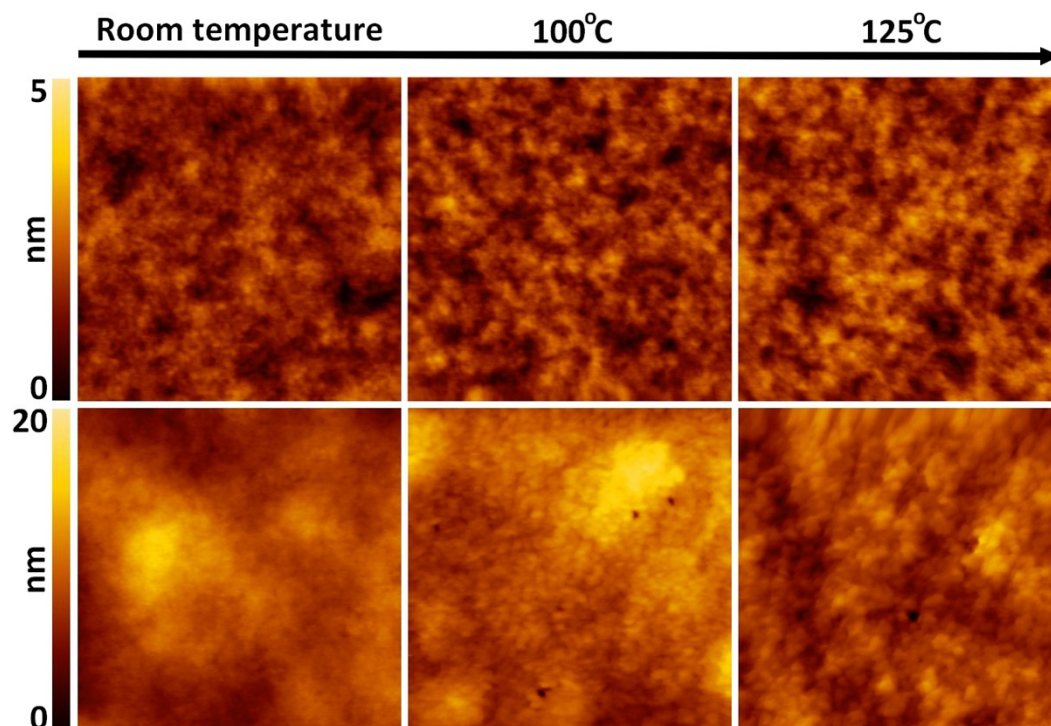

Figure S3: AFM images of (top) bCar:PC<sub>71</sub>BM and (bottom) PCDTBT:PC<sub>71</sub>BM active layers annealed at increasing temperatures.

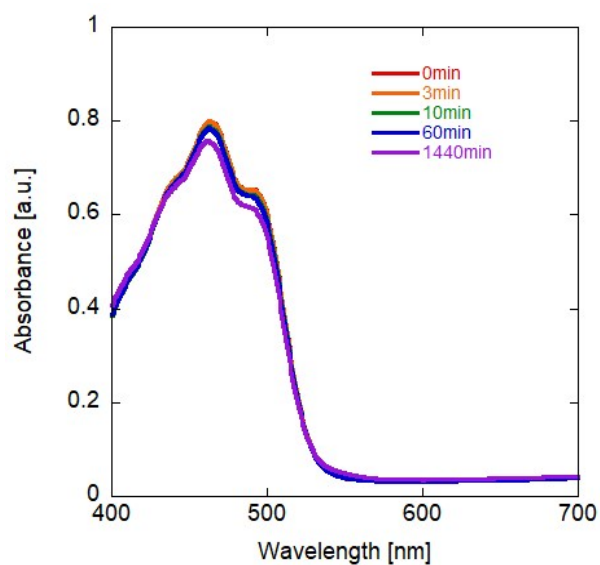

Figure S4: Absorption spectra of encapsulated bCar thin films under continuous irradiation at 1 sun for up to 24h.
